# Supplementary material for: Novel Dual-Target Kinase Inhibitors of EGFR and ALK Were Designed, Synthesized, and Induced Cell Apoptosis in Non-Small Cell Lung Cancer
Source: MDPI journal article supplement (doi:10.3390/molecules28052006), 2023-02-21
Supplement: s1 [file s1]

# Novel Dual-Target Kinase Inhibitors of EGFR and ALK Were Designed, Synthesized, and Induced Cell Apoptosis in Non-Small Cell Lung Cancer

Wei Li <sup>2,†</sup>, Yangyang Fan <sup>1,†</sup>, Wenyan Nie <sup>1</sup>, Han Yao <sup>2</sup>, Yuanyuan Ren <sup>2</sup>, Mengxuan Wang <sup>1</sup>, Haoran Nie <sup>1</sup>, Chenxi Gu <sup>2</sup>, Jiadai Liu <sup>2</sup> and Baijiao An <sup>1,3,\*</sup>

<sup>1</sup> School of Pharmacy, Binzhou Medical University, Yantai 264003, China

<sup>2</sup> School of Pharmaceutical Sciences, Sun Yat-Sen University, Guangzhou 510006, China

<sup>3</sup> Shandong Technology Innovation Center of Molecular Targeting and Intelligent Diagnosis and Treatment, Yantai 264003, China

## Supplementary Contents

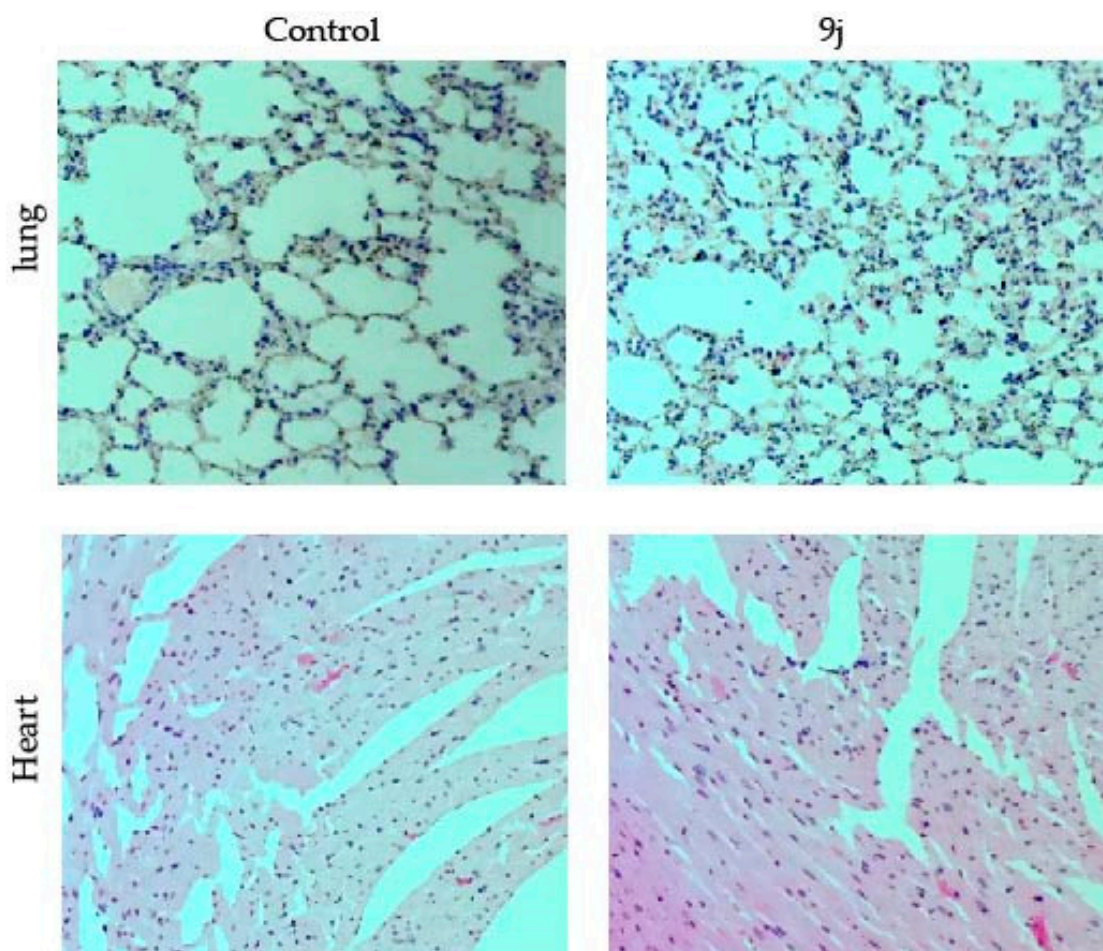

**Figure S1.** HE staining of mouse lungs and hearts

## NMR spectra of compounds

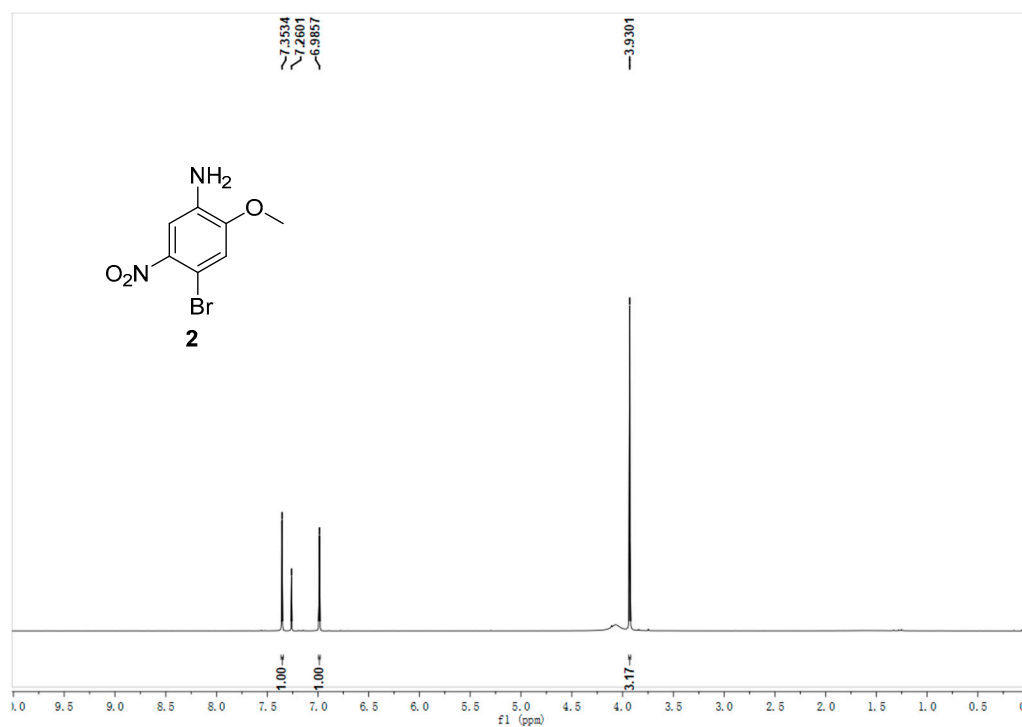

Figure S2. <sup>1</sup>H NMR Spectrum of **2** in CDCl<sub>3</sub>

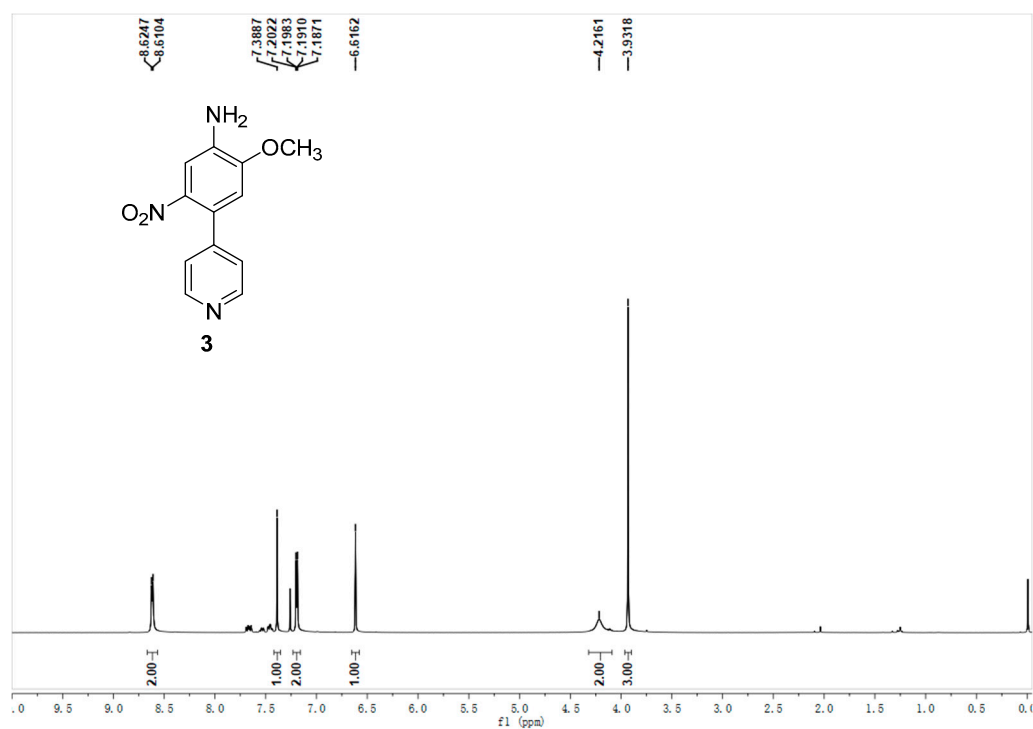

Figure S3. <sup>1</sup>H NMR Spectrum of **3** in CDCl<sub>3</sub>

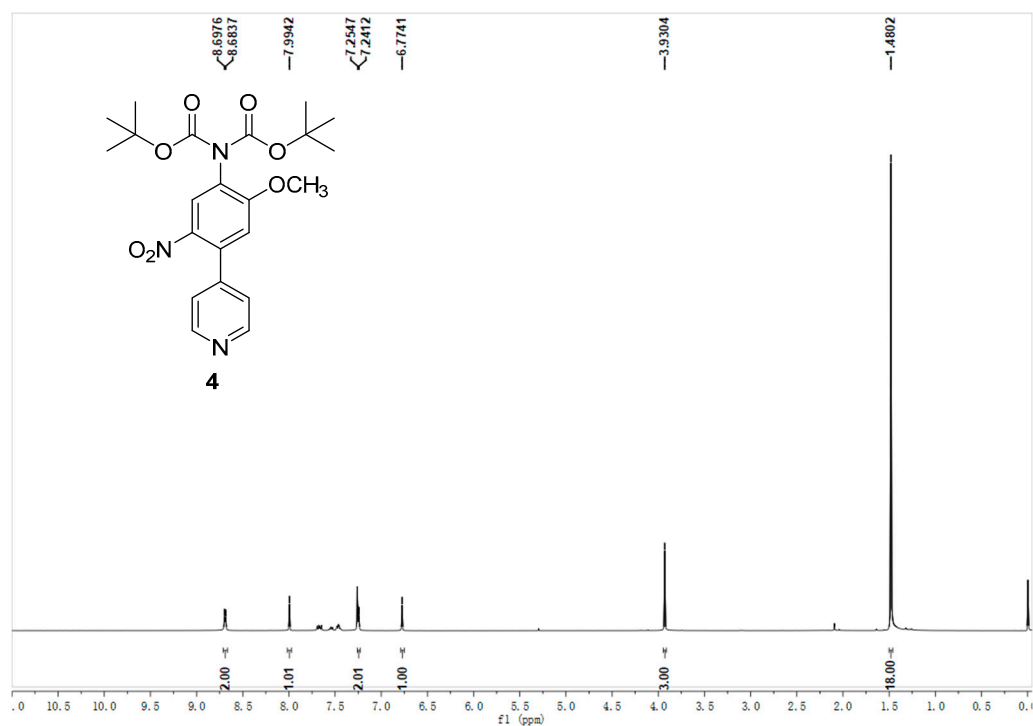

Figure S4. <sup>1</sup>H NMR Spectrum of **4** in CDCl<sub>3</sub>

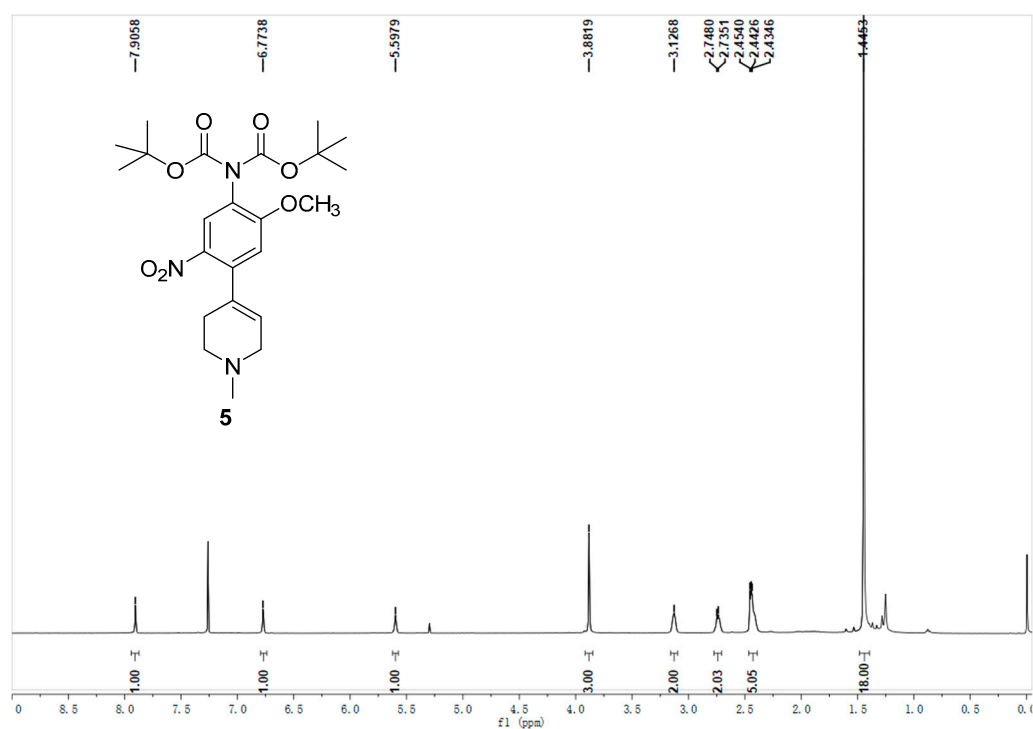

Figure S5. <sup>1</sup>H NMR Spectrum of **5** in CDCl<sub>3</sub>

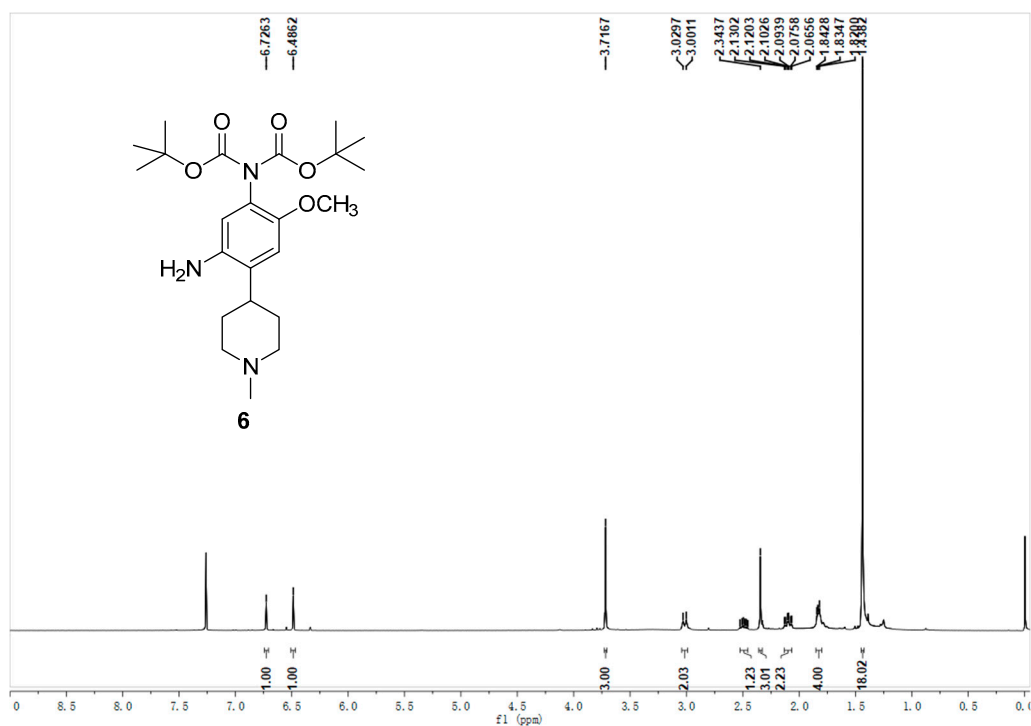

Figure S6. <sup>1</sup>H NMR Spectrum of **6** in CDCl<sub>3</sub>

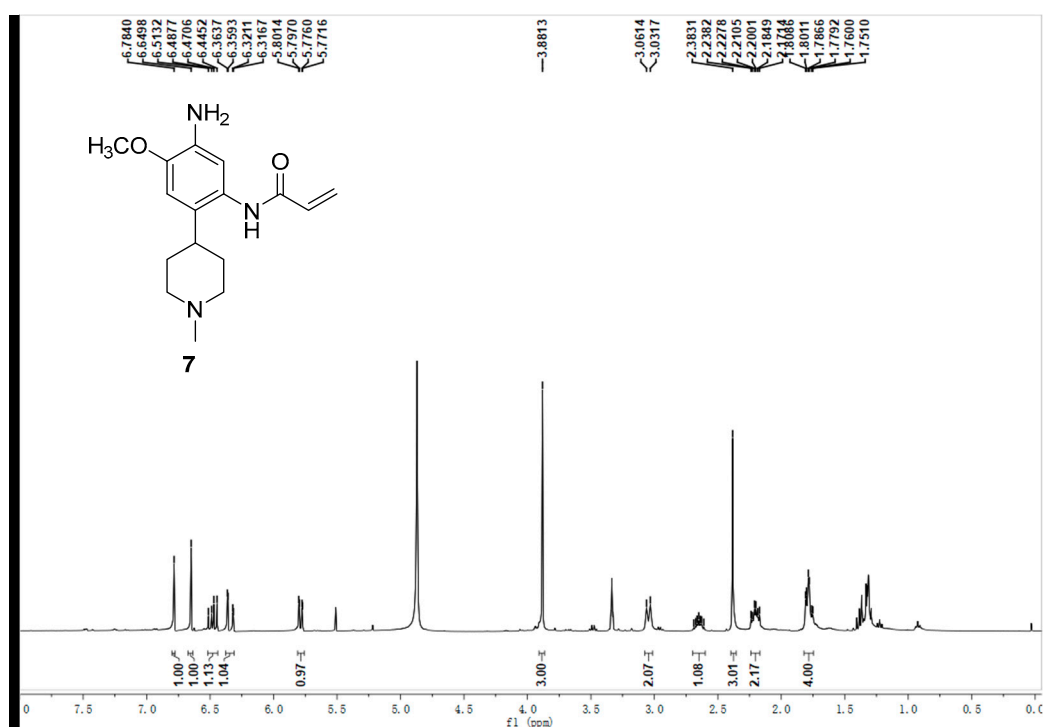

Figure S7. <sup>1</sup>H NMR Spectrum of **7** in CD<sub>3</sub>OD

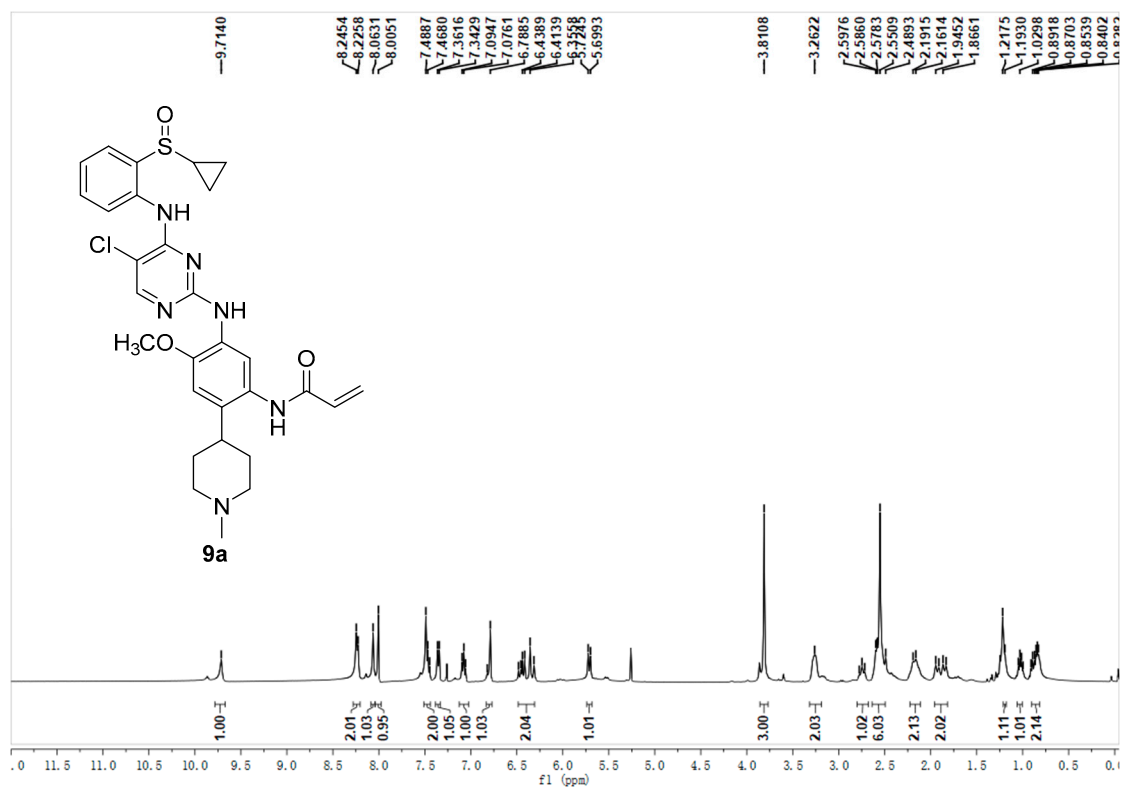

**Figure S8.** <sup>1</sup>H NMR Spectrum of **9a** in CDCl<sub>3</sub>

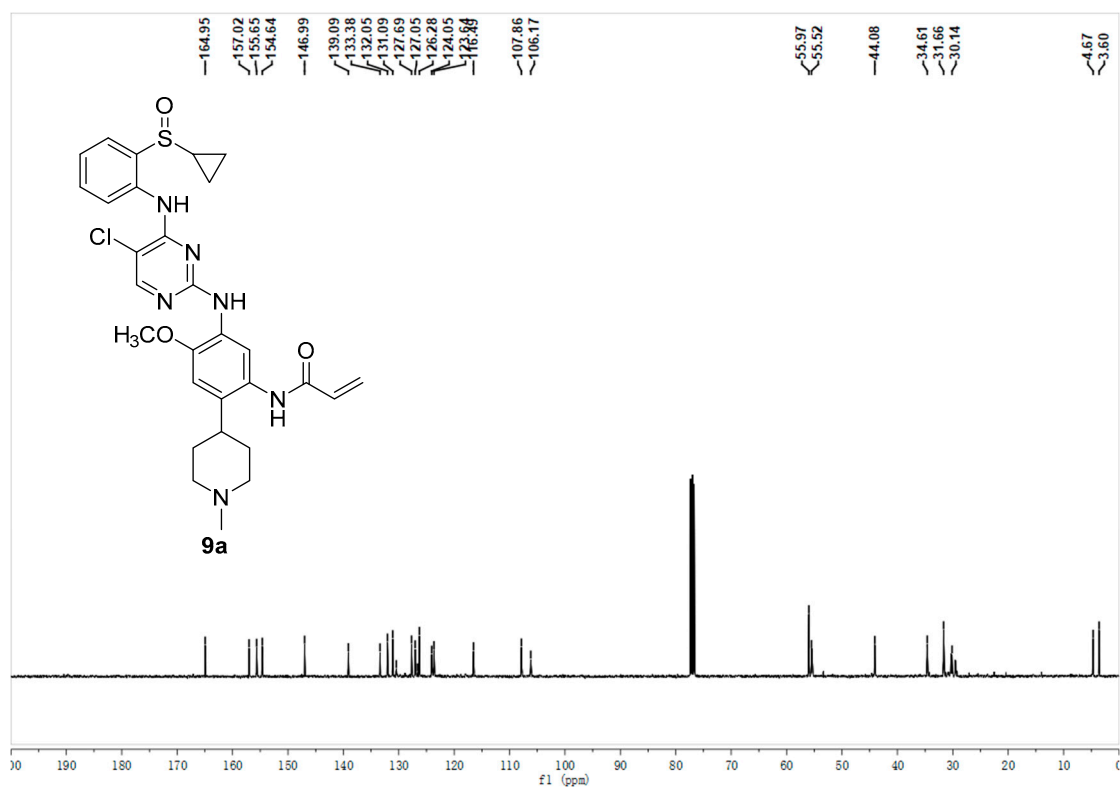

**Figure S9.** <sup>13</sup>C NMR Spectrum of **9a** in CDCl<sub>3</sub>

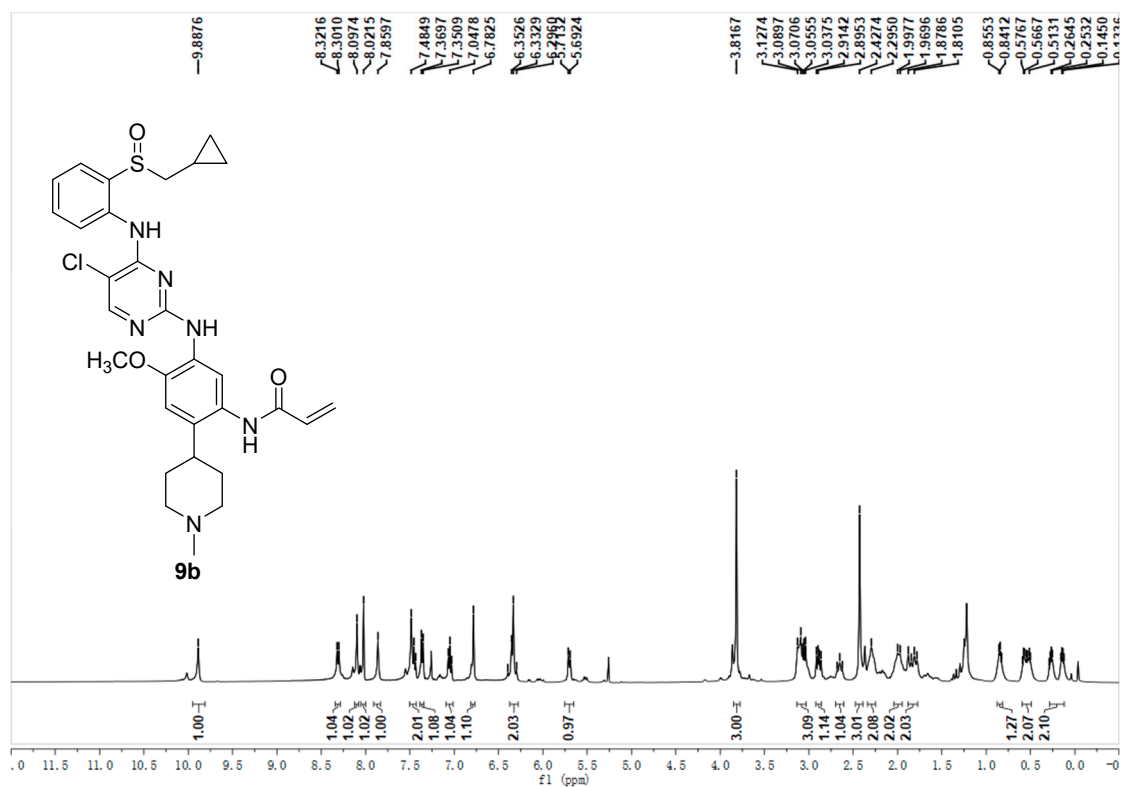

Figure S10. <sup>1</sup>H NMR Spectrum of **9b** in CDCl<sub>3</sub>

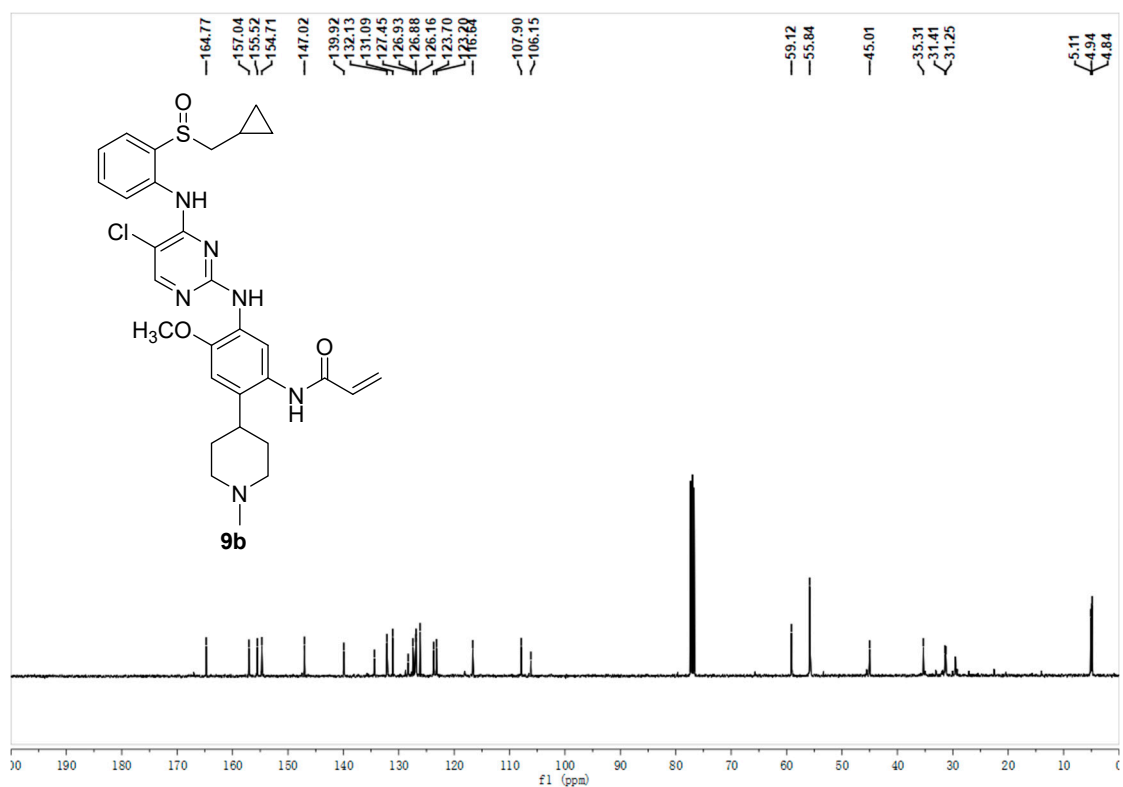

Figure S11. <sup>13</sup>C NMR Spectrum of **9b** in CDCl<sub>3</sub>

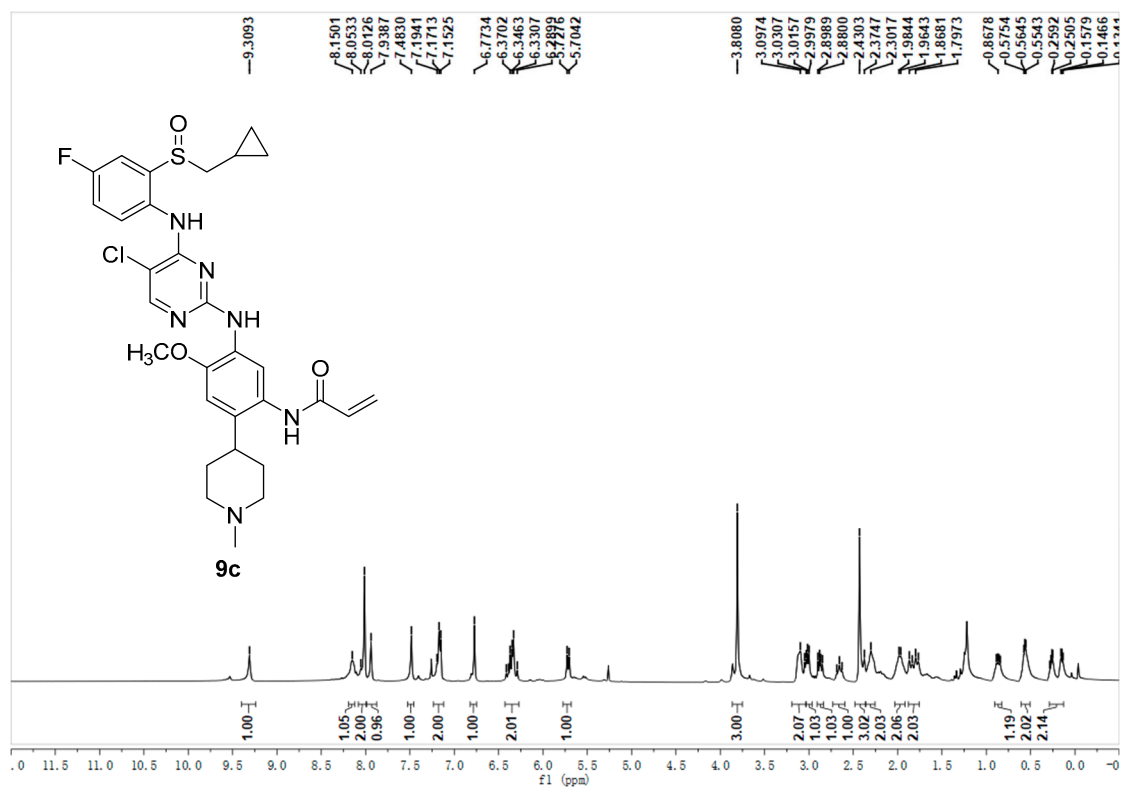

**Figure S12.** <sup>1</sup>H NMR Spectrum of **9c** in CDCl<sub>3</sub>

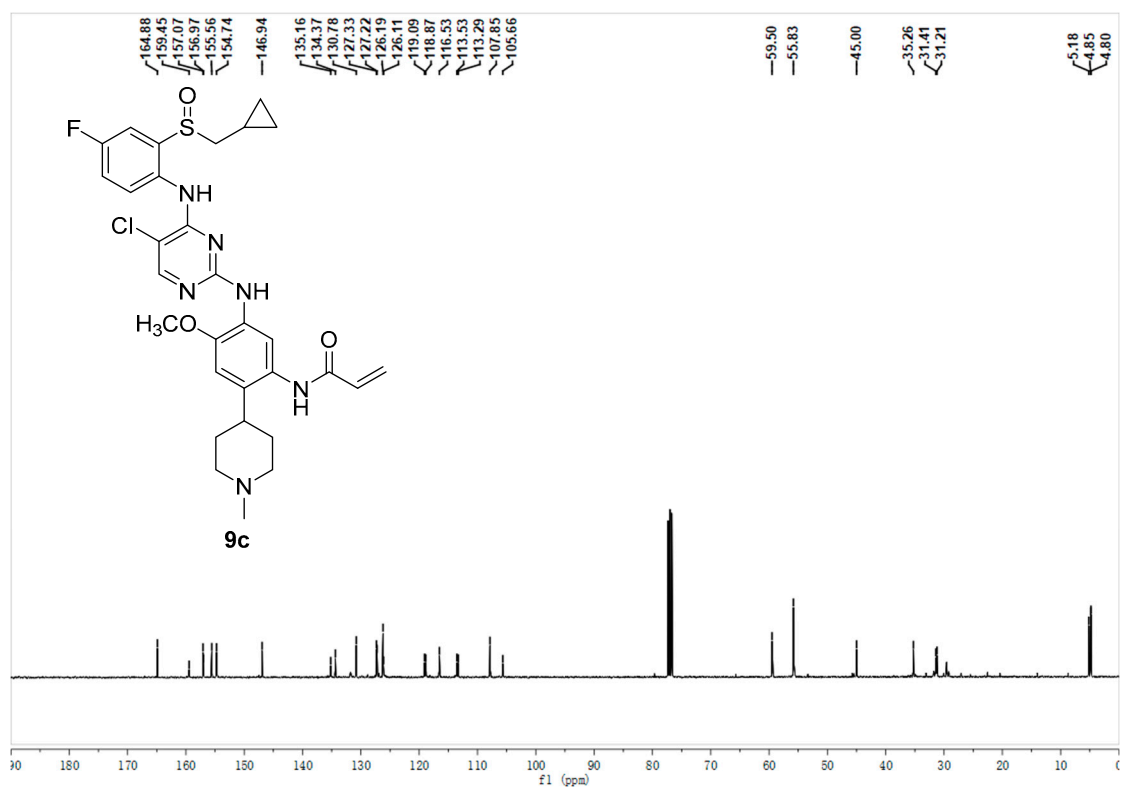

**Figure S13.** <sup>13</sup>C NMR Spectrum of **9c** in CDCl<sub>3</sub>

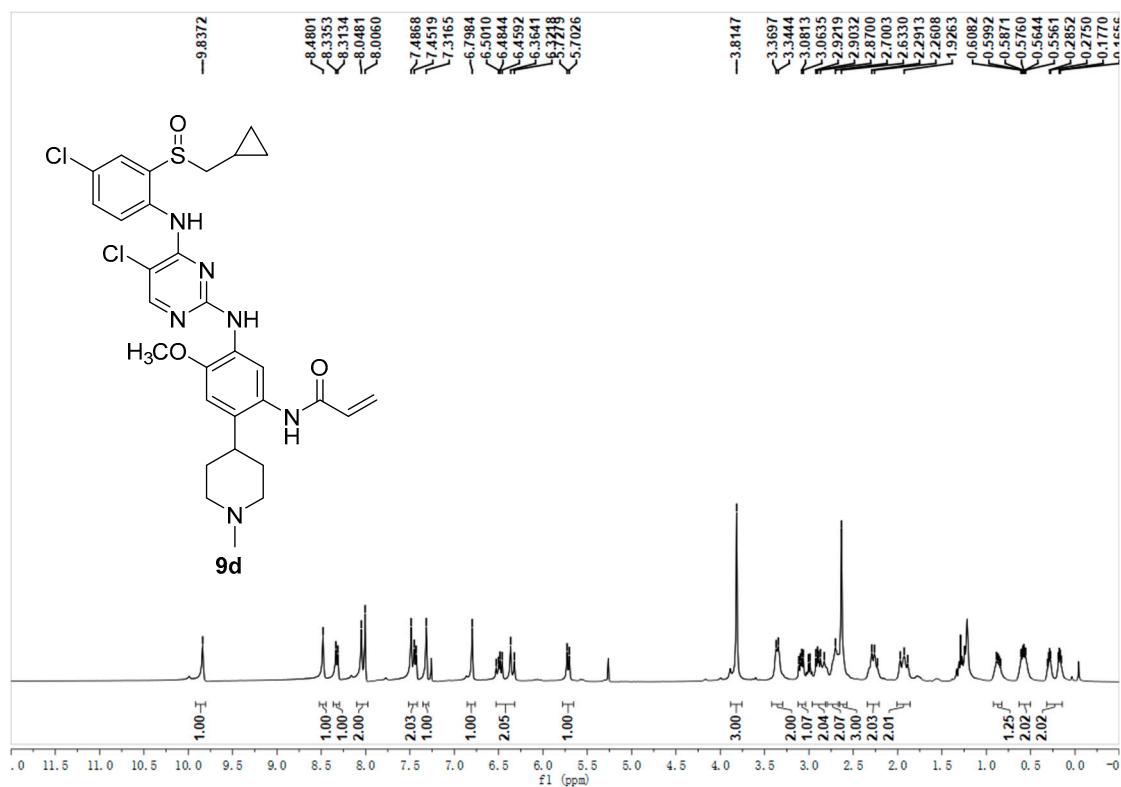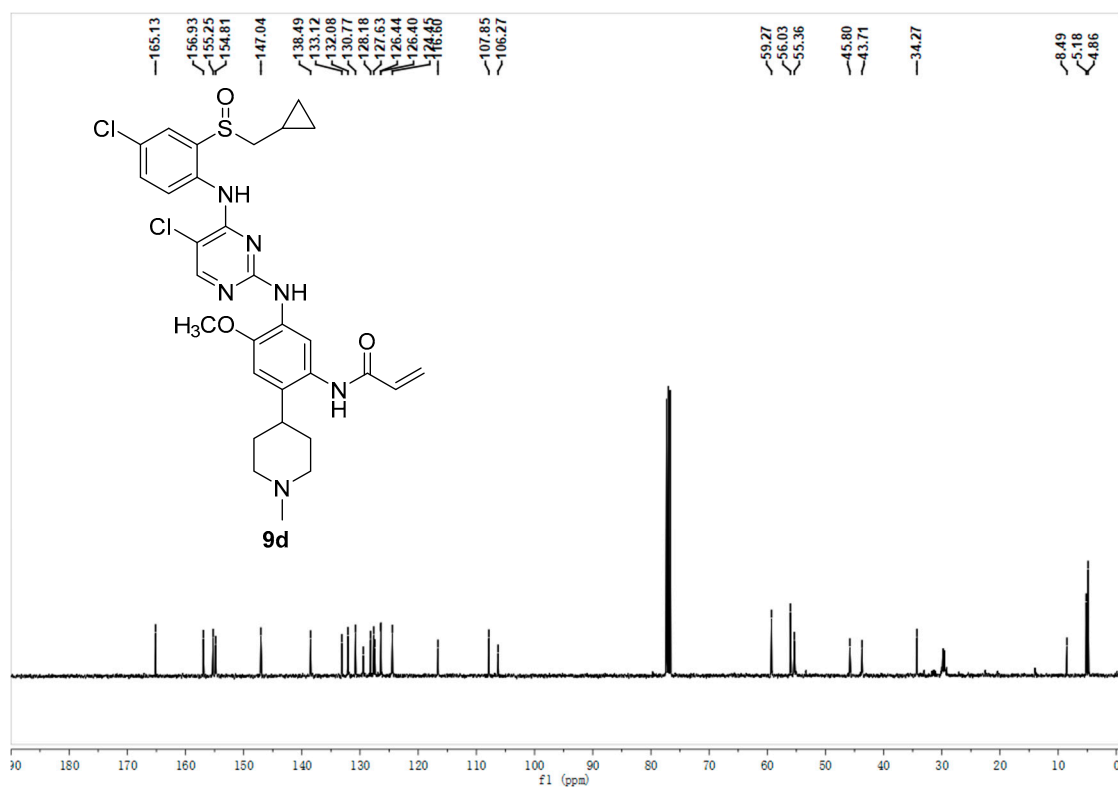



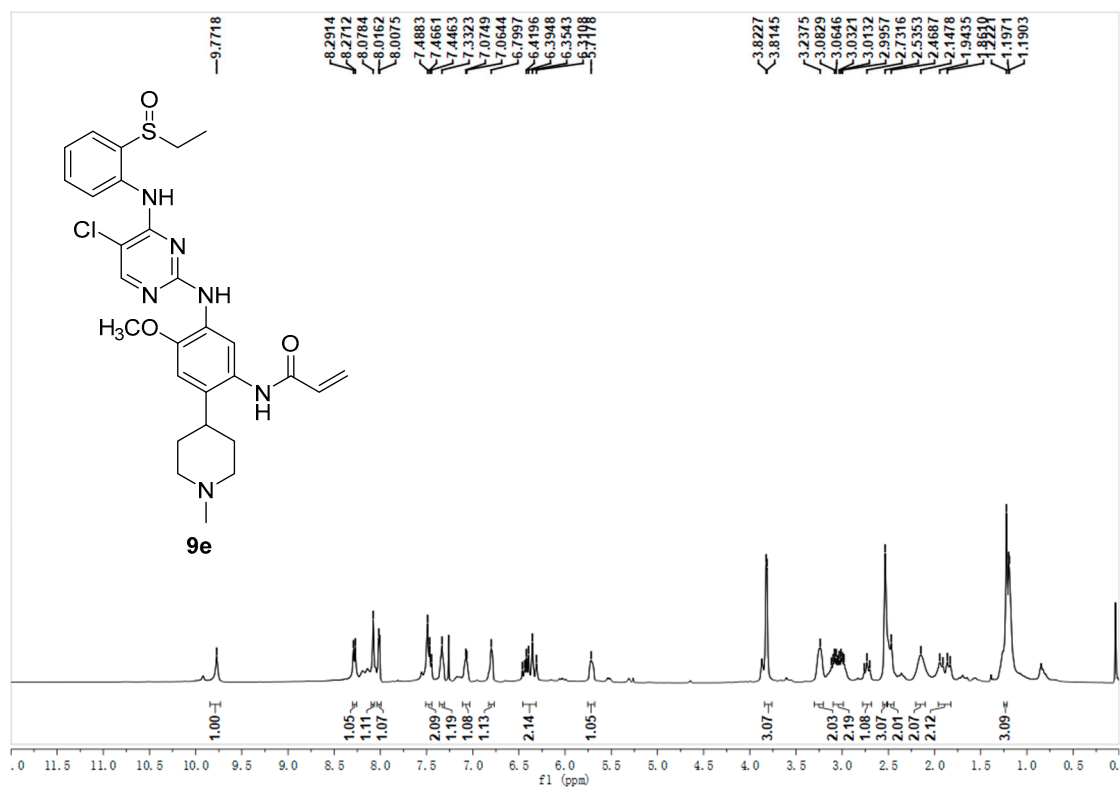

Figure S16. <sup>1</sup>H NMR Spectrum of **9e** in CDCl<sub>3</sub>

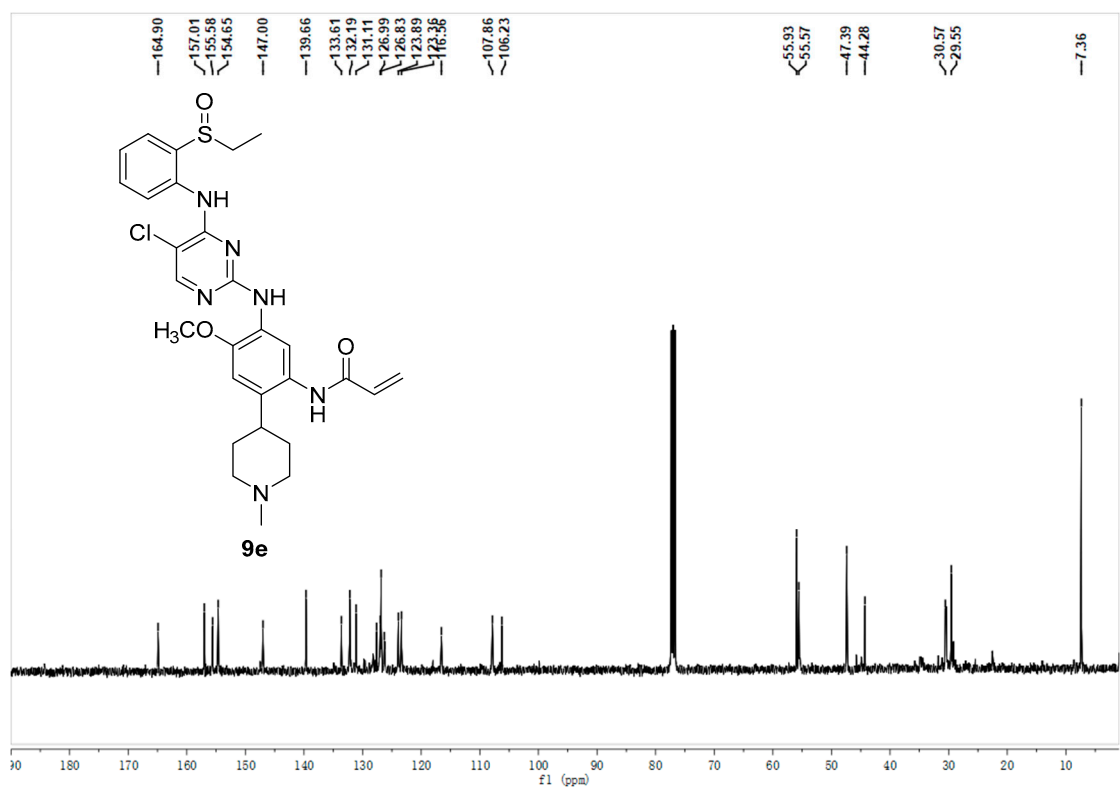

Figure S17. <sup>13</sup>C NMR Spectrum of **9e** in CDCl<sub>3</sub>

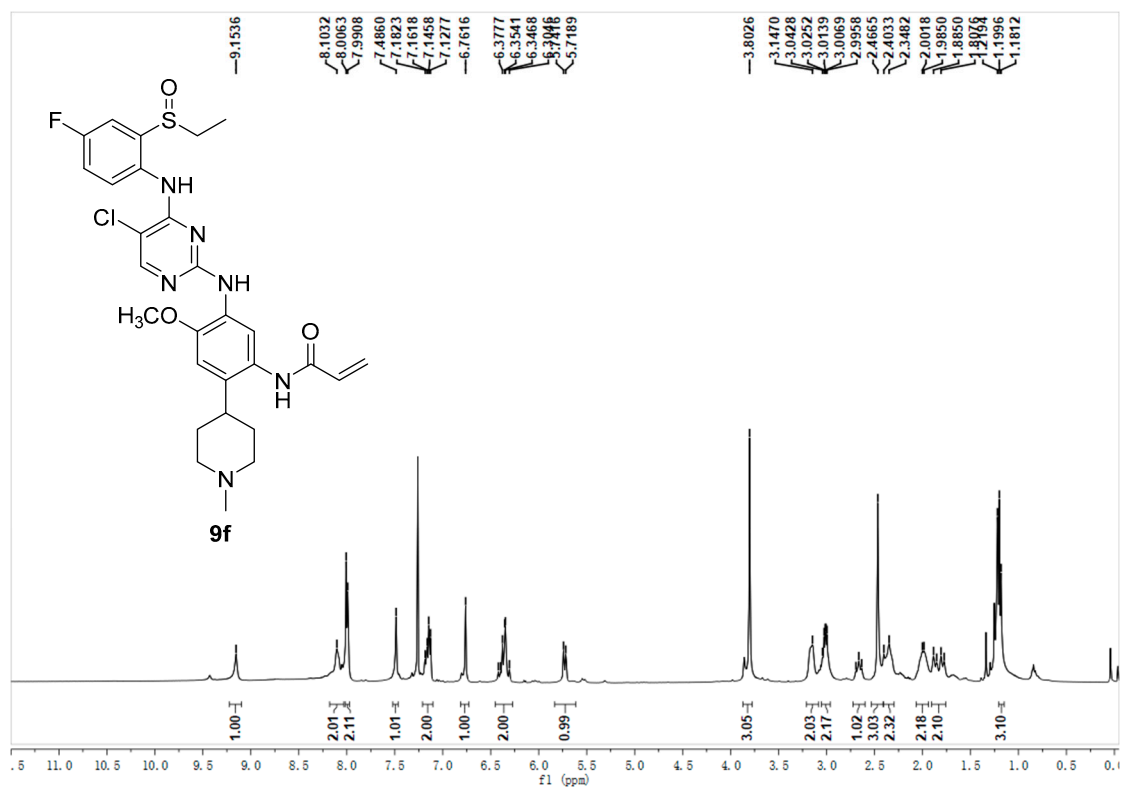

**Figure S18.** <sup>1</sup>H NMR Spectrum of **9f** in CDCl<sub>3</sub>

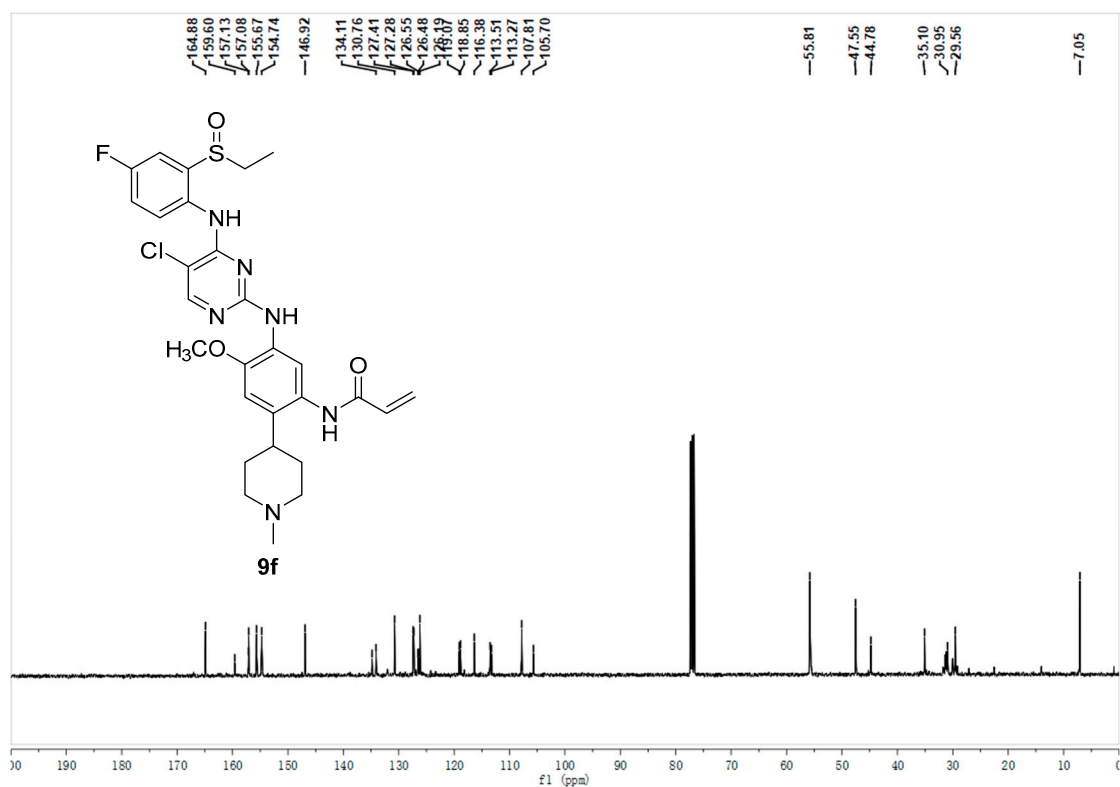

**Figure S19.** <sup>13</sup>C NMR Spectrum of **9f** in CDCl<sub>3</sub>

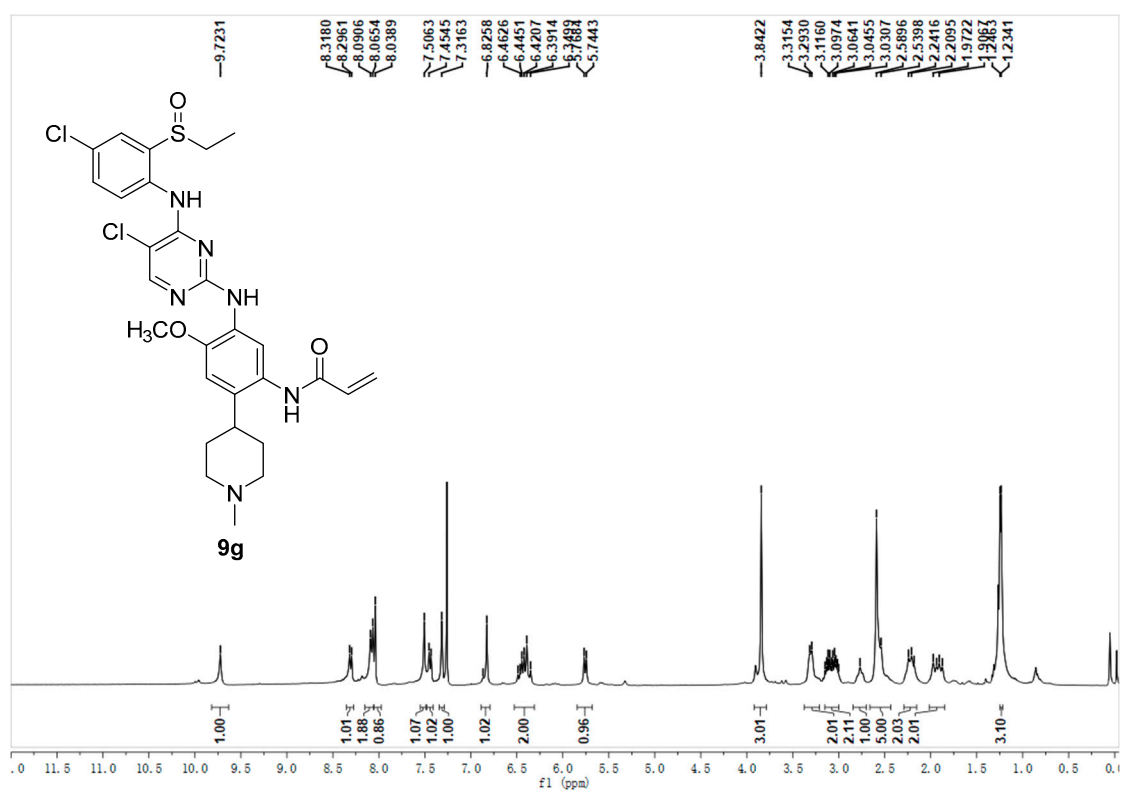

Figure S20. <sup>1</sup>H NMR Spectrum of **9g** in CDCl<sub>3</sub>

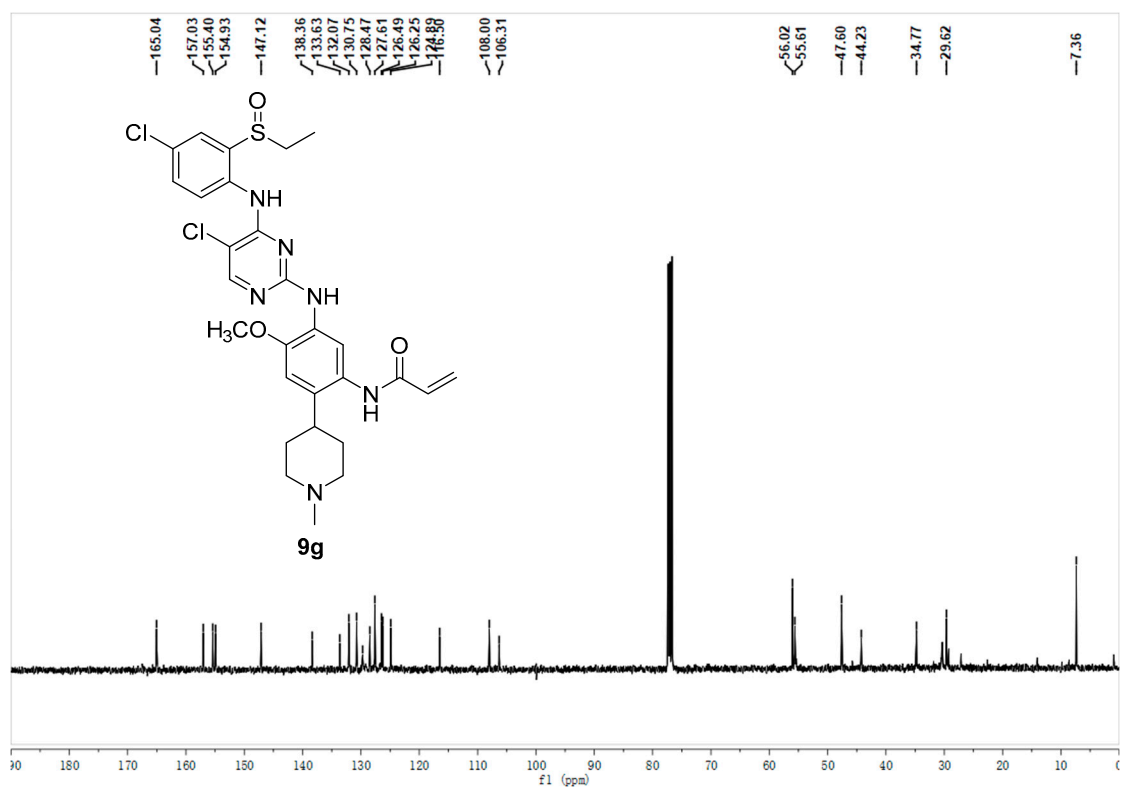

Figure S21. <sup>13</sup>C NMR Spectrum of **9g** in CDCl<sub>3</sub>

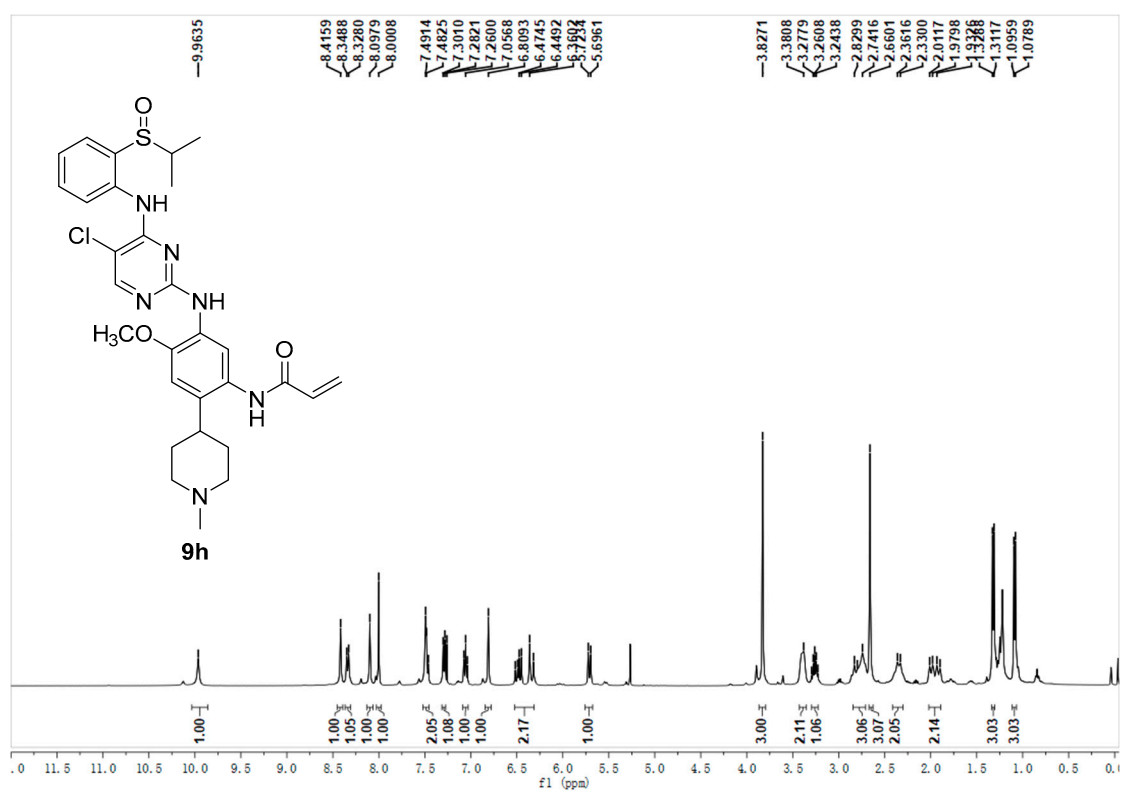

**Figure S22.** <sup>1</sup>H NMR Spectrum of **9h** in CDCl<sub>3</sub>

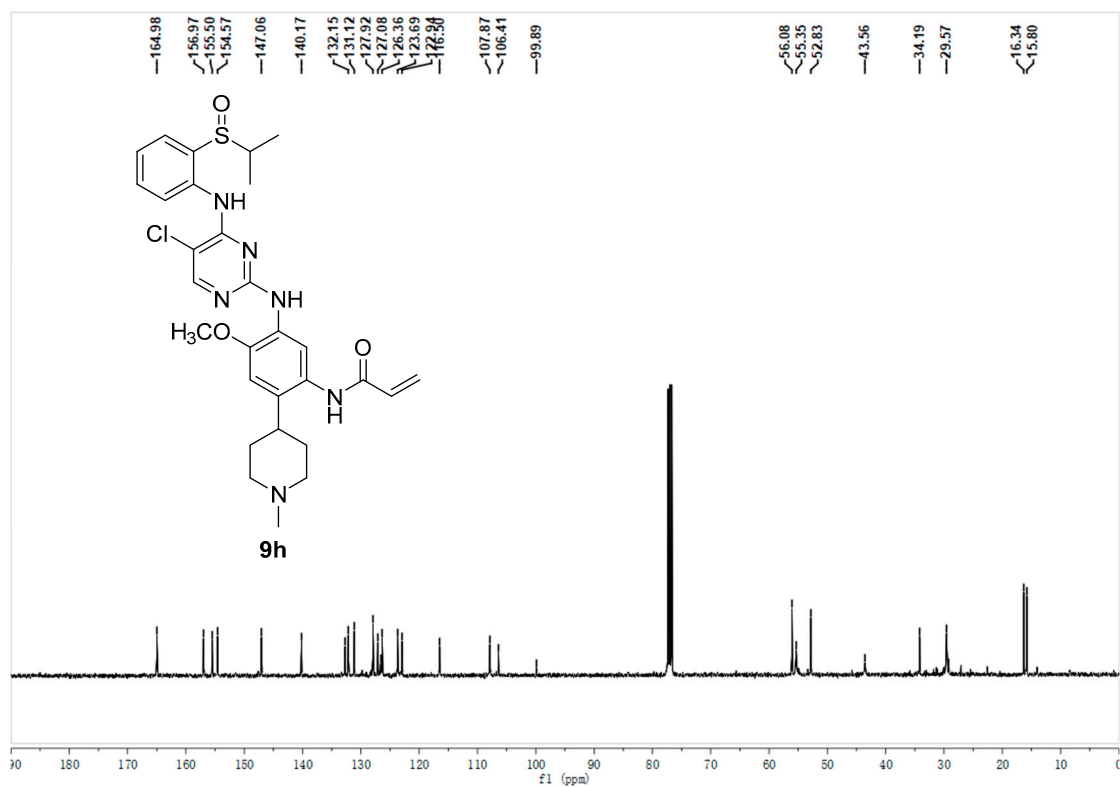

**Figure S23.** <sup>13</sup>C NMR Spectrum of **9h** in CDCl<sub>3</sub>

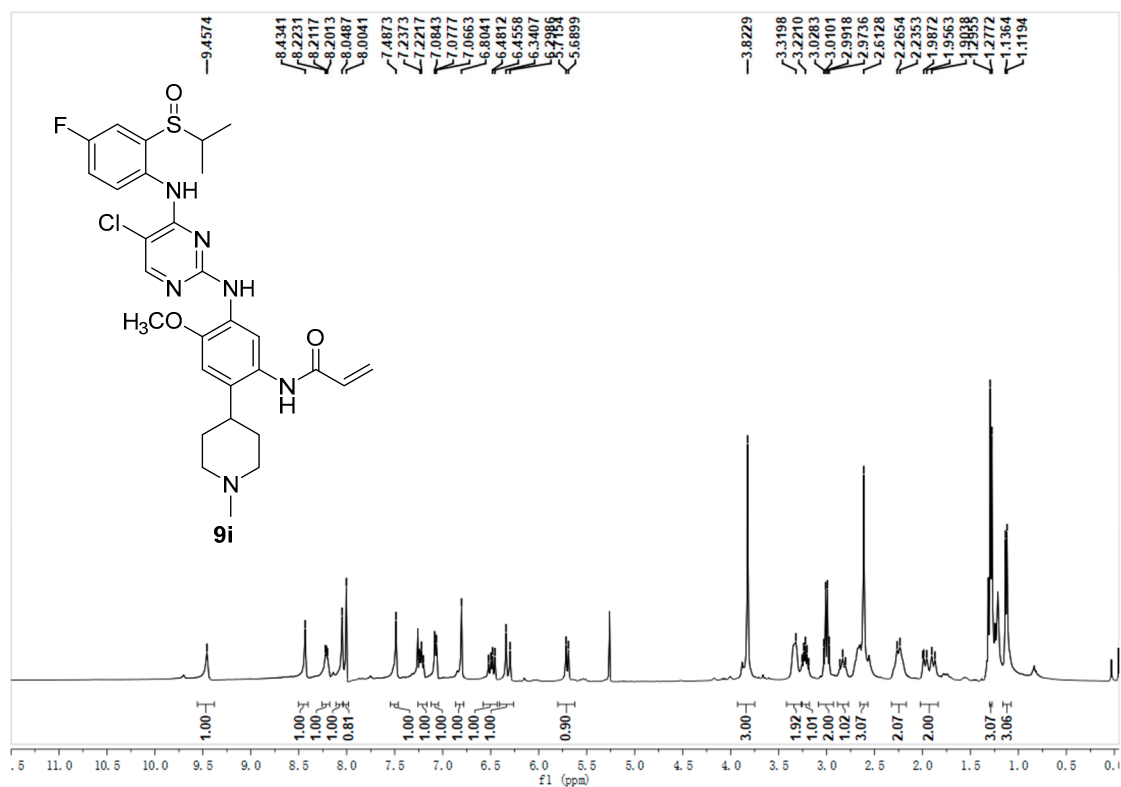

Figure S24. <sup>1</sup>H NMR Spectrum of **9i** in CDCl<sub>3</sub>

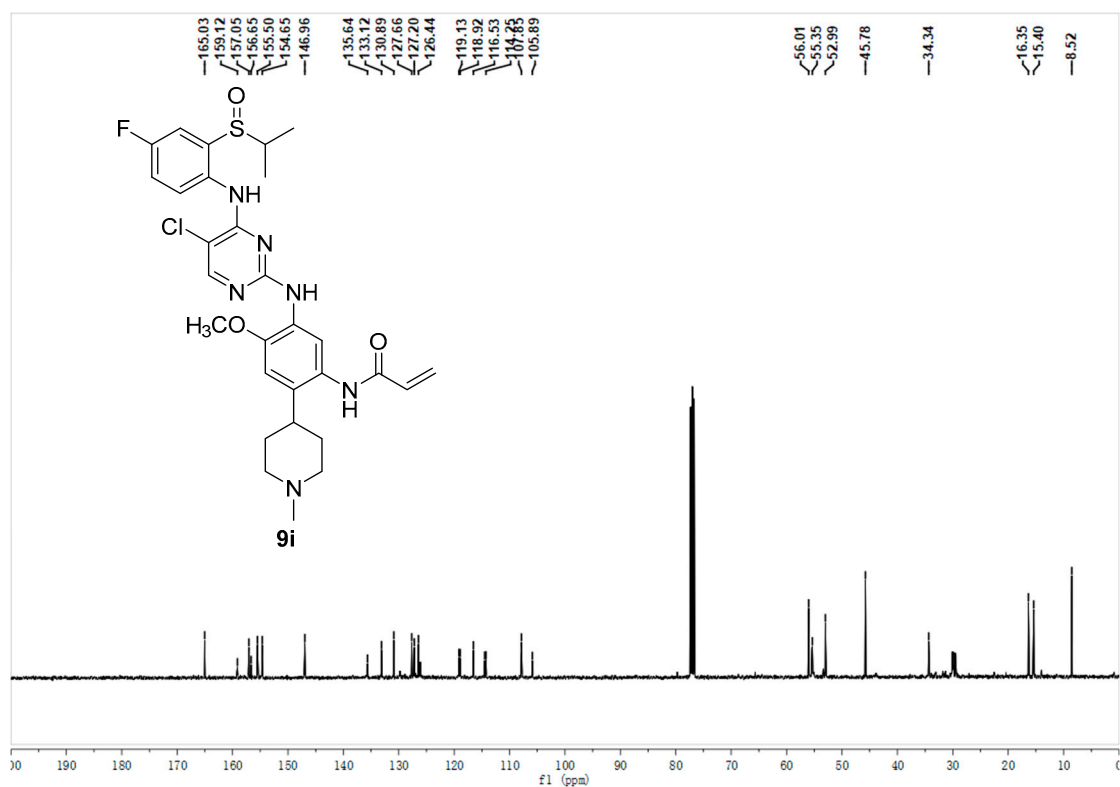

Figure S25. <sup>13</sup>C NMR Spectrum of **9i** in CDCl<sub>3</sub>

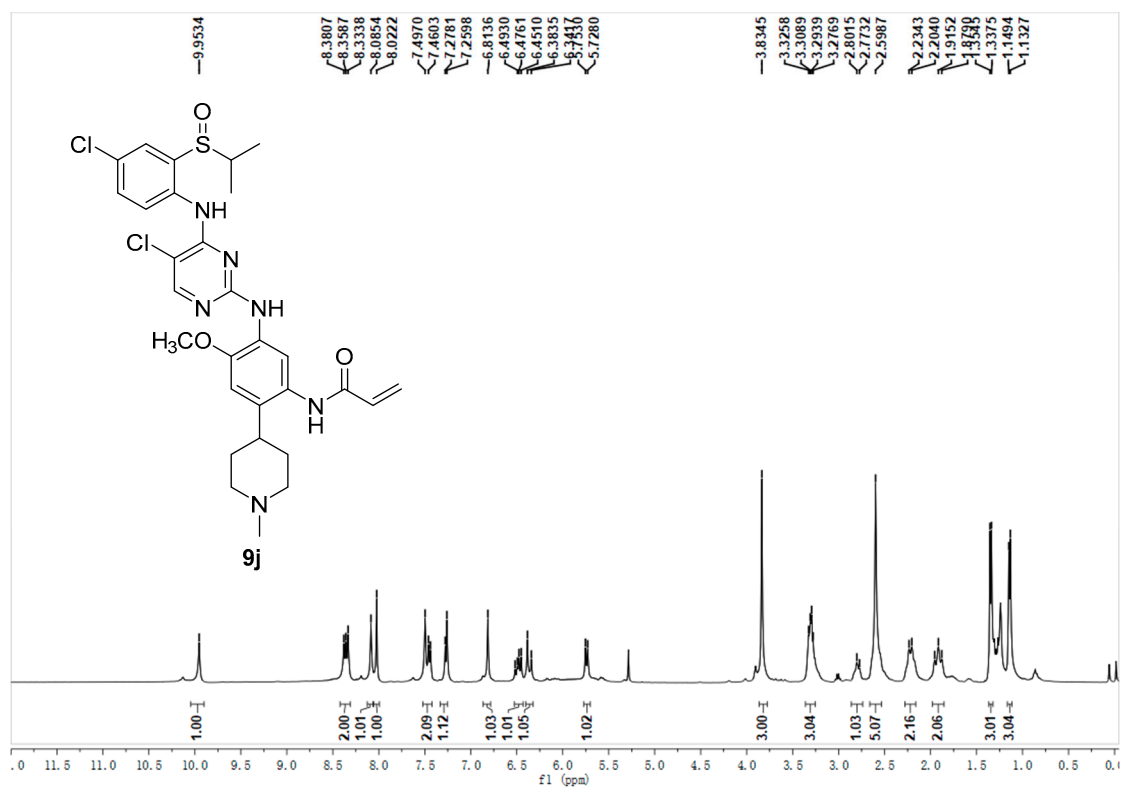

Figure S26. <sup>1</sup>H NMR Spectrum of **9j** in CDCl<sub>3</sub>

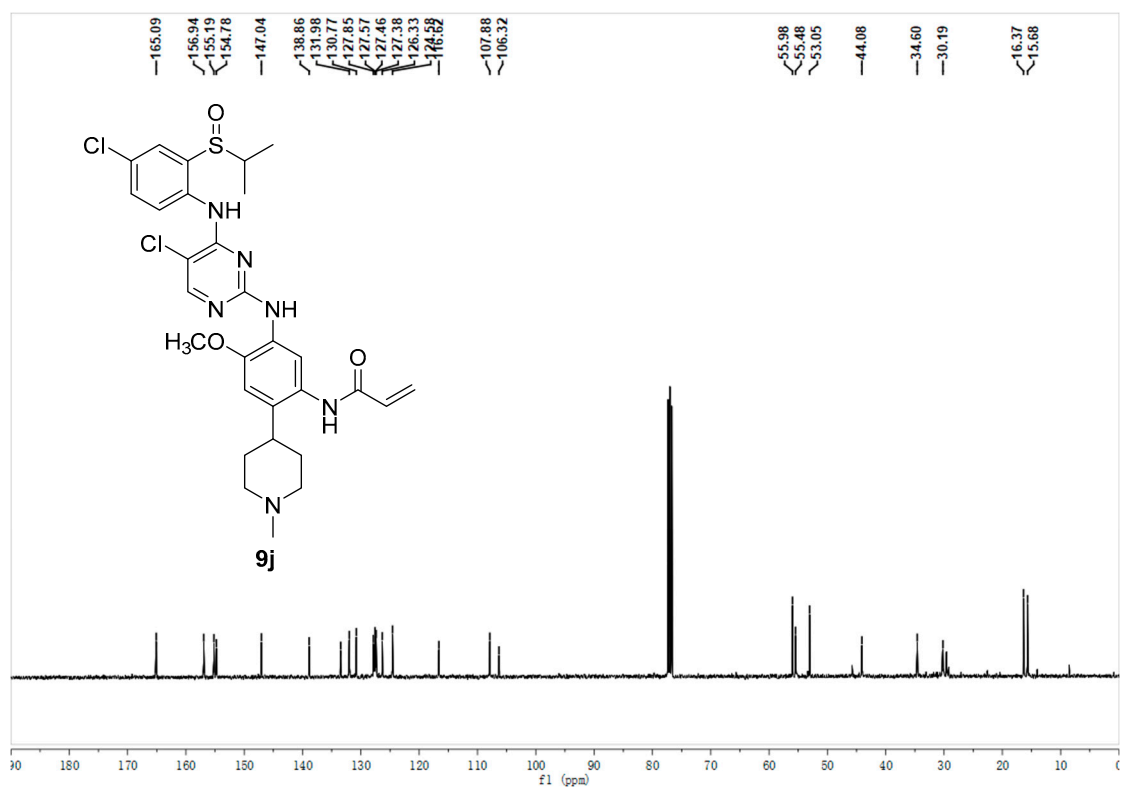

Figure S27. <sup>13</sup>C NMR Spectrum of **9j** in CDCl<sub>3</sub>

## HRMS spectra of compounds

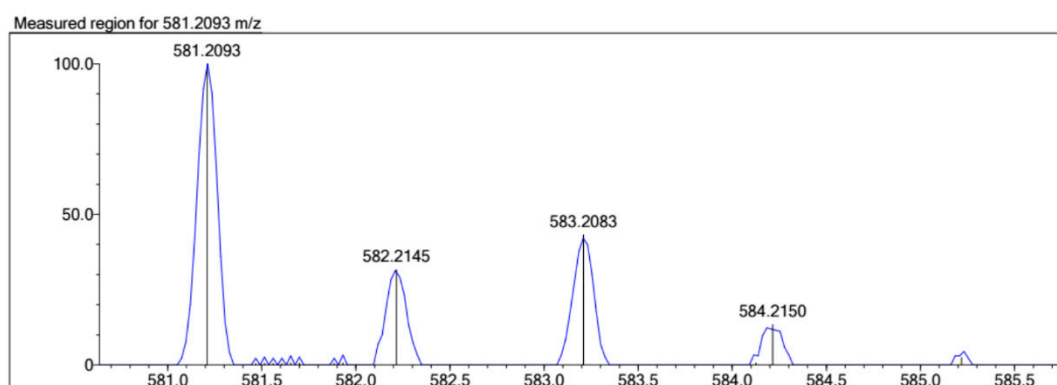

Figure S28. HRMS spectrum of **9a**

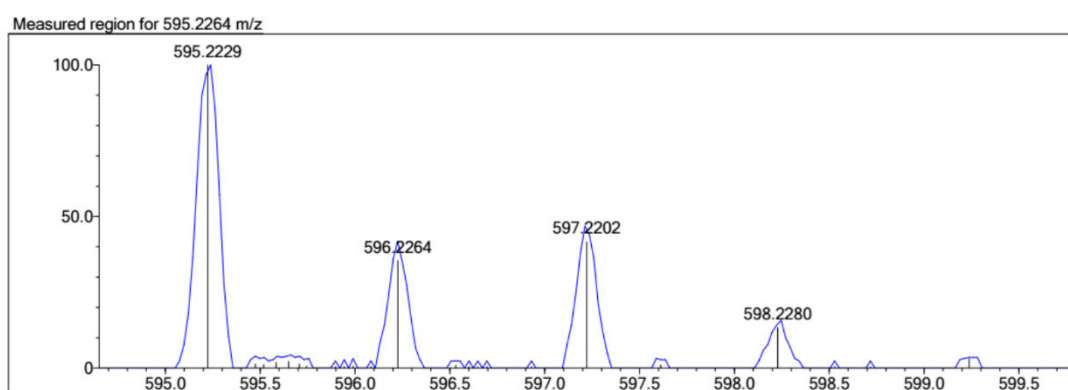

Figure S29. HRMS spectrum of **9b**

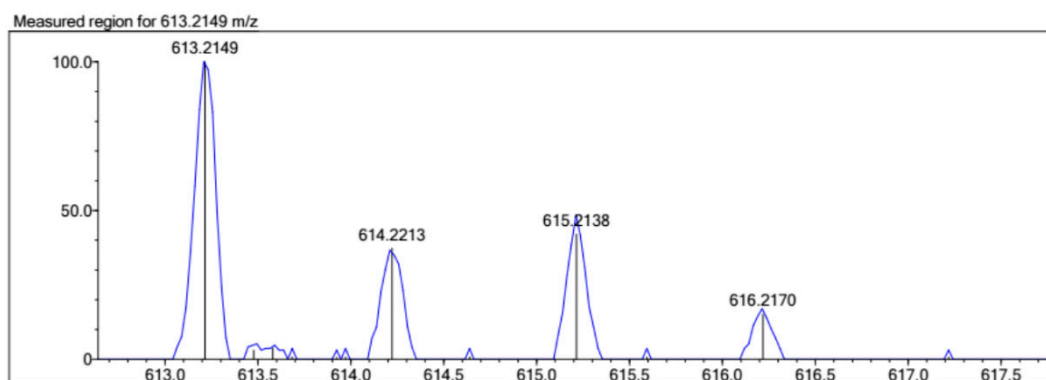

Figure S30. HRMS spectrum of **9c**

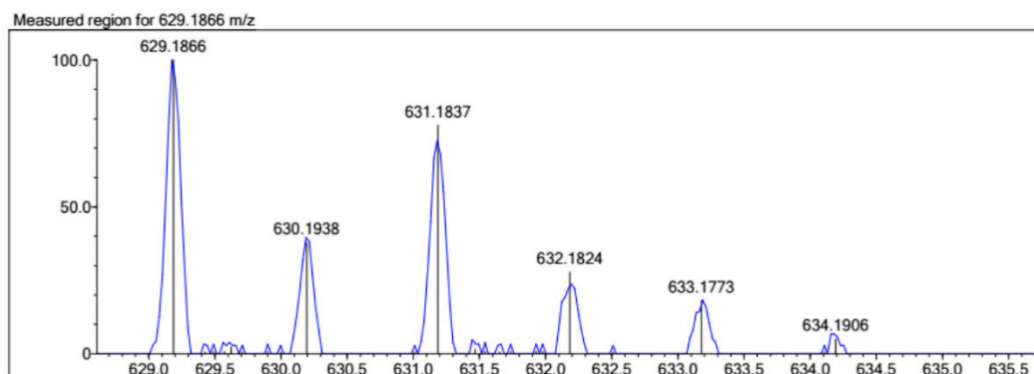

Figure S31. HRMS spectrum of **9d**

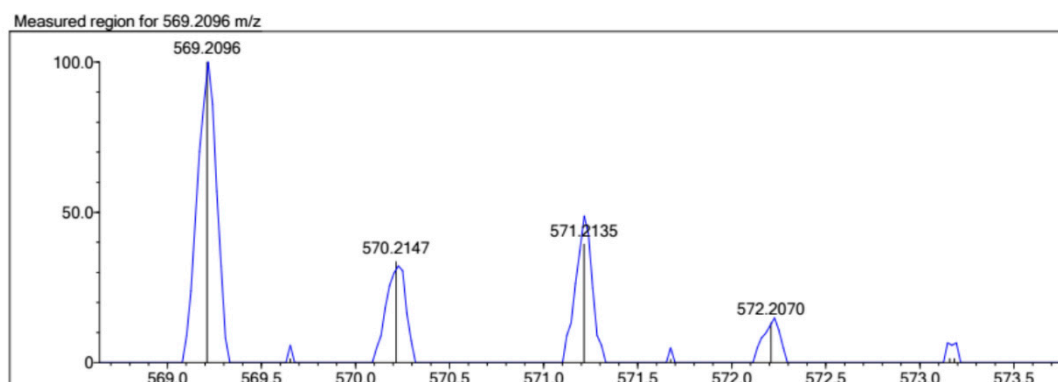

Figure S32. HRMS spectrum of **9e**

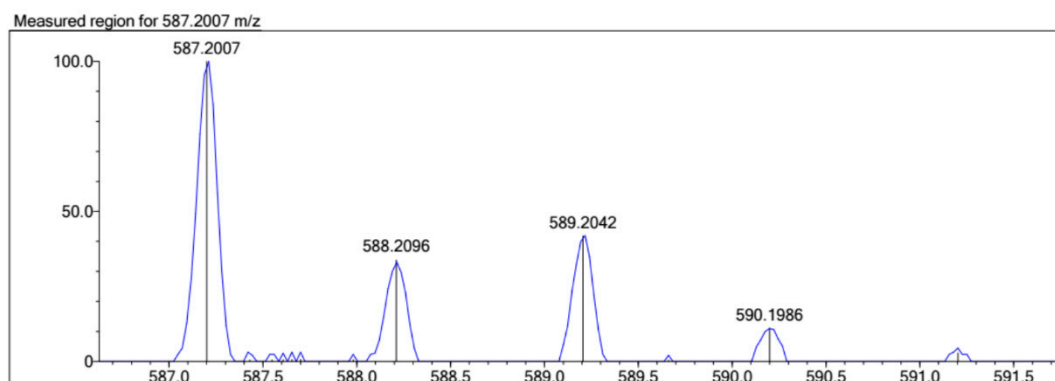

Figure S33. HRMS spectrum of **9f**

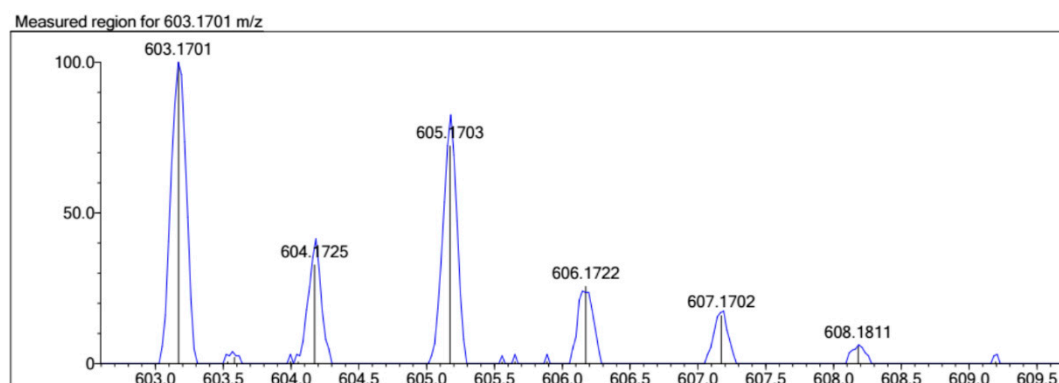



**Figure S34.** HRMS spectrum of **9g**

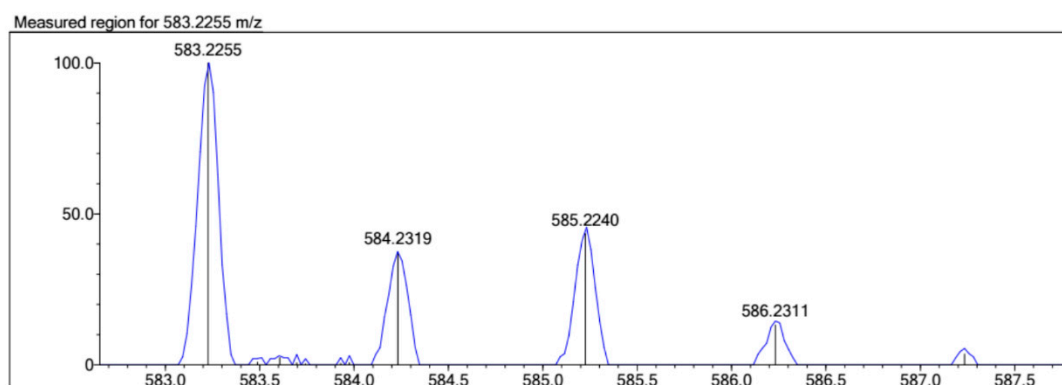

**Figure S35.** HRMS spectrum of **9h**

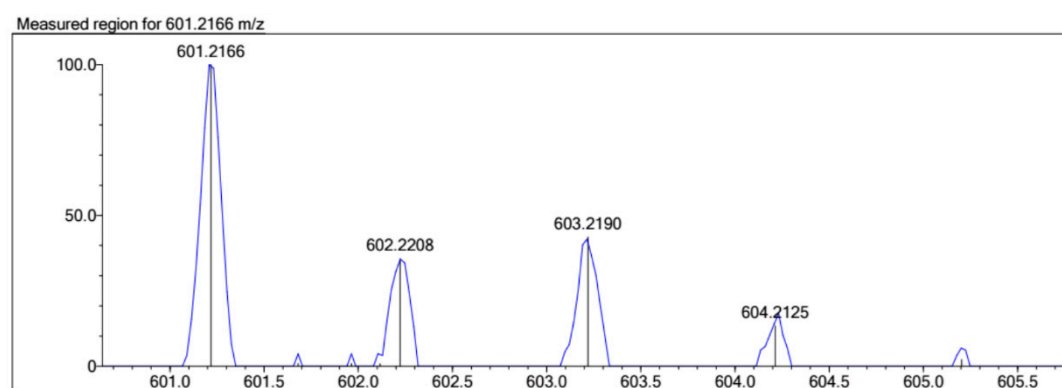

**Figure S36.** HRMS spectrum of **9i**

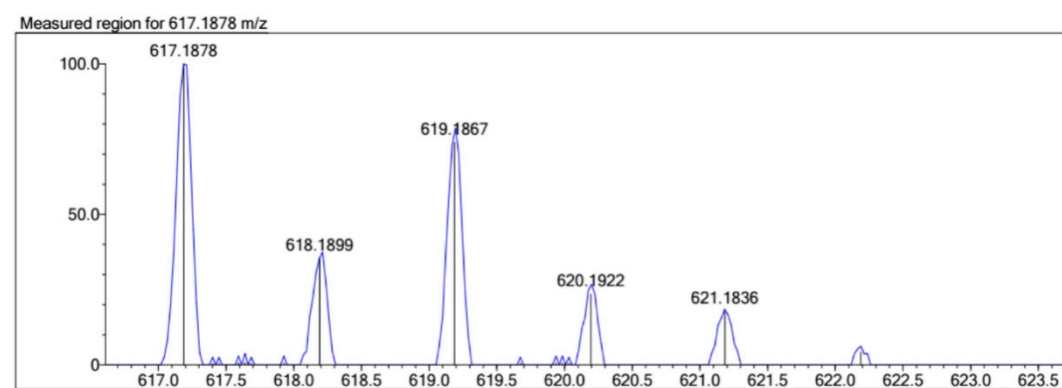

**Figure S37.** HRMS spectrum of **9j**

HPLC of compounds

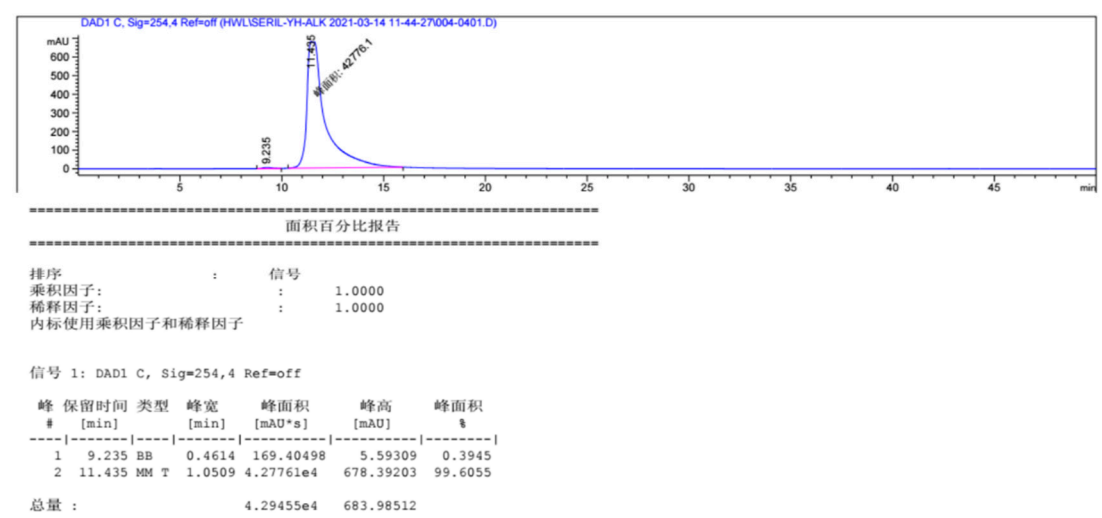

Figure S38. HPLC of 9a

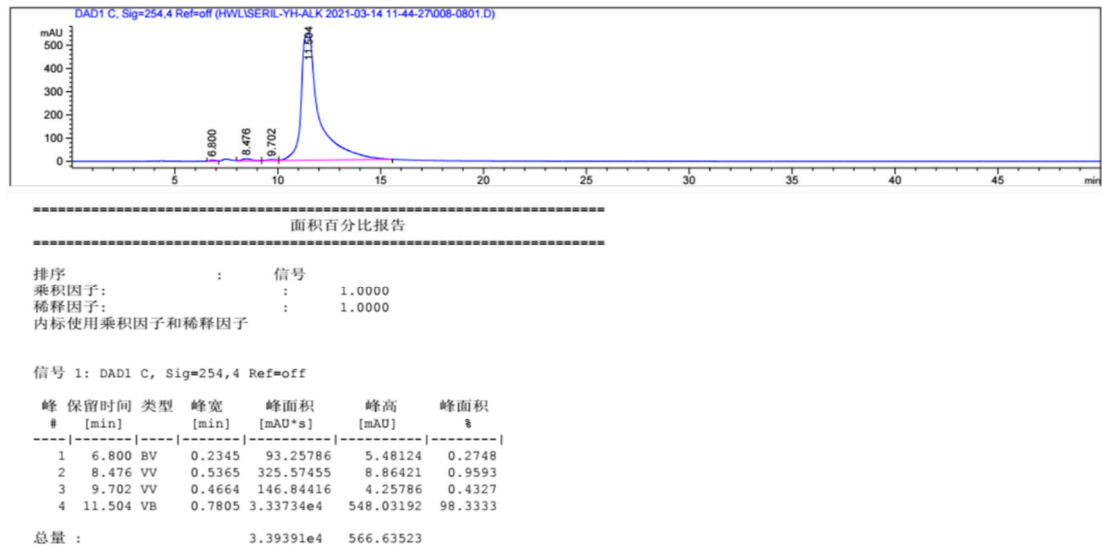

Figure S39. HPLC of 9b

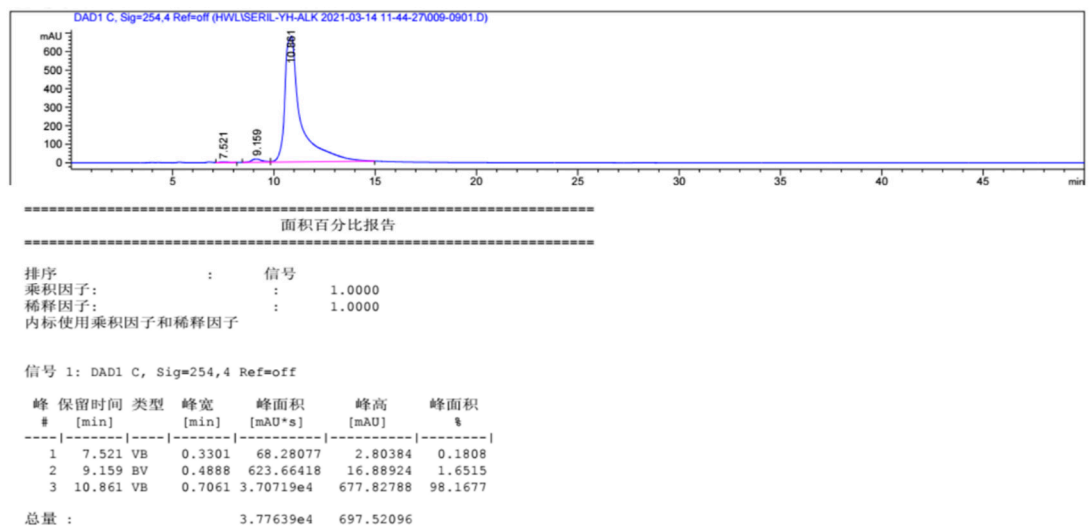

Figure S40. HPLC of 9c

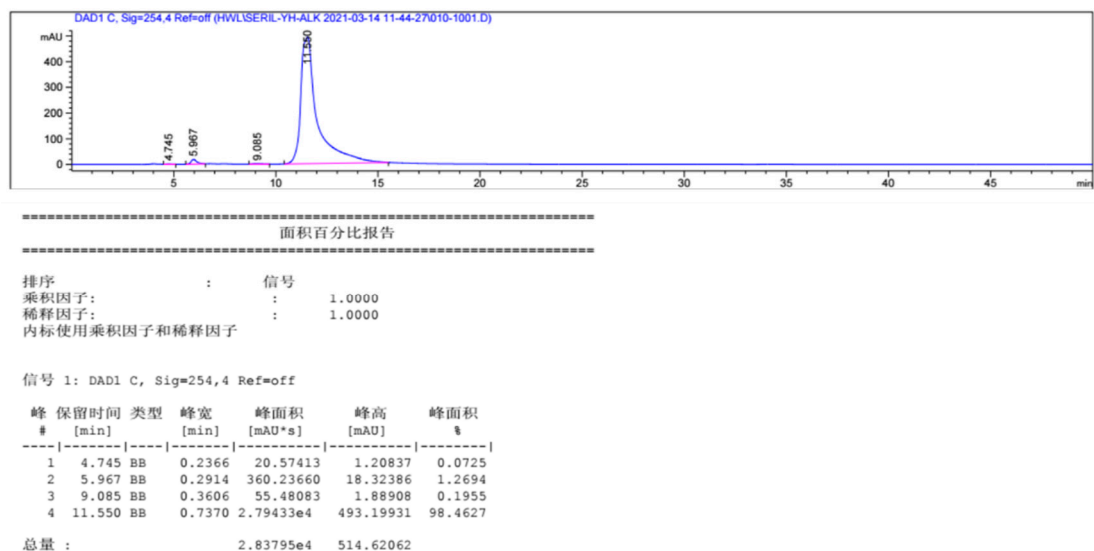

Figure S41. HPLC of 9d

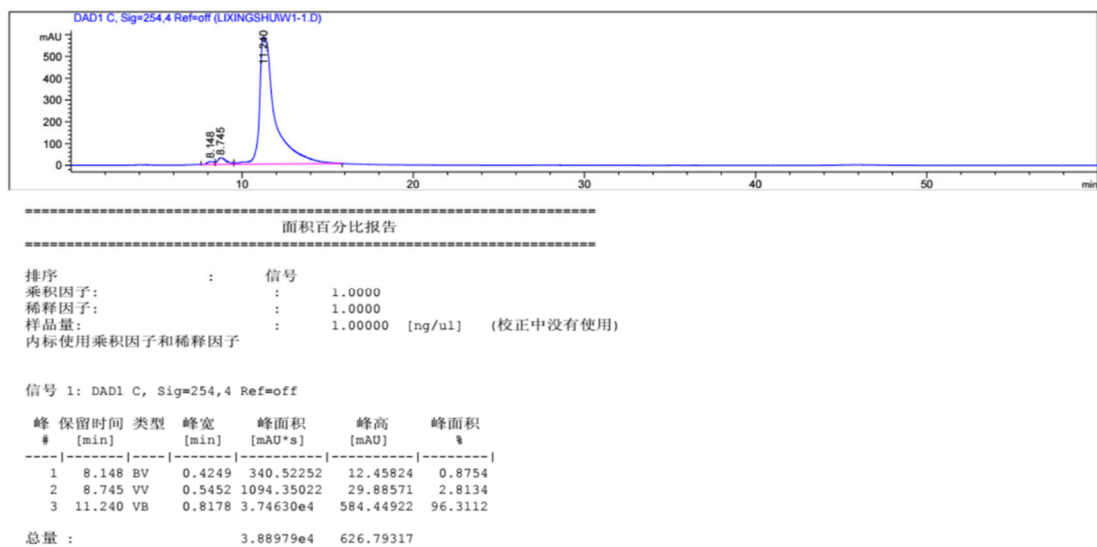

Figure S42. HPLC of 9e

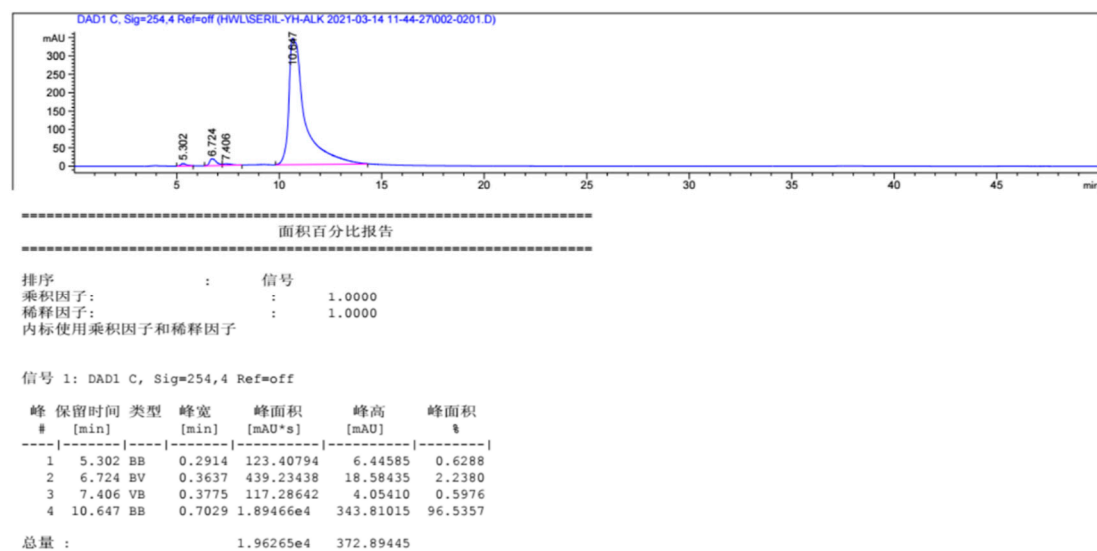

Figure S43. HPLC of 9f

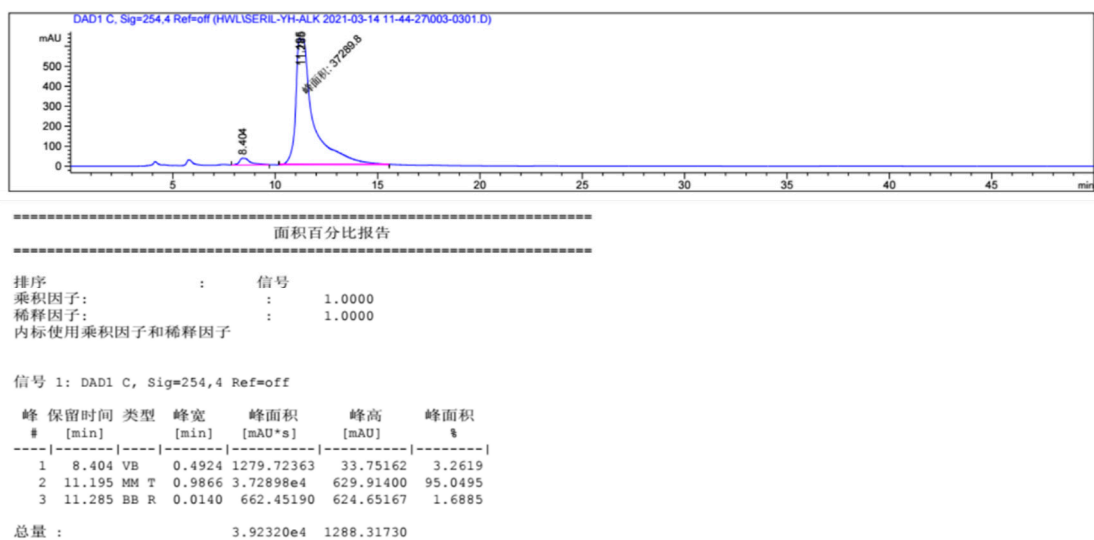

Figure S44. HPLC of 9g

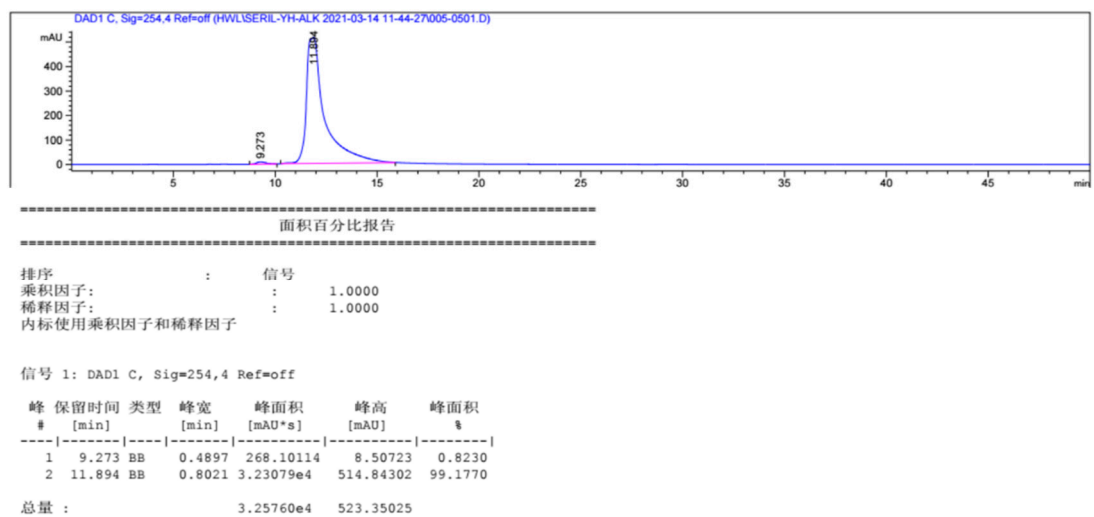

Figure S45. HPLC of 9h

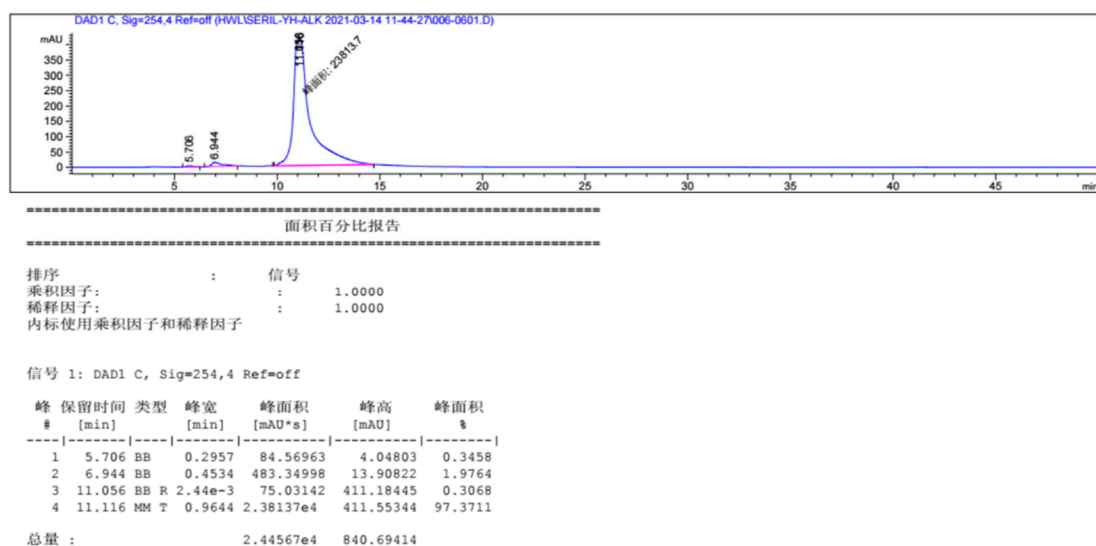

Figure S46. HPLC of 9i

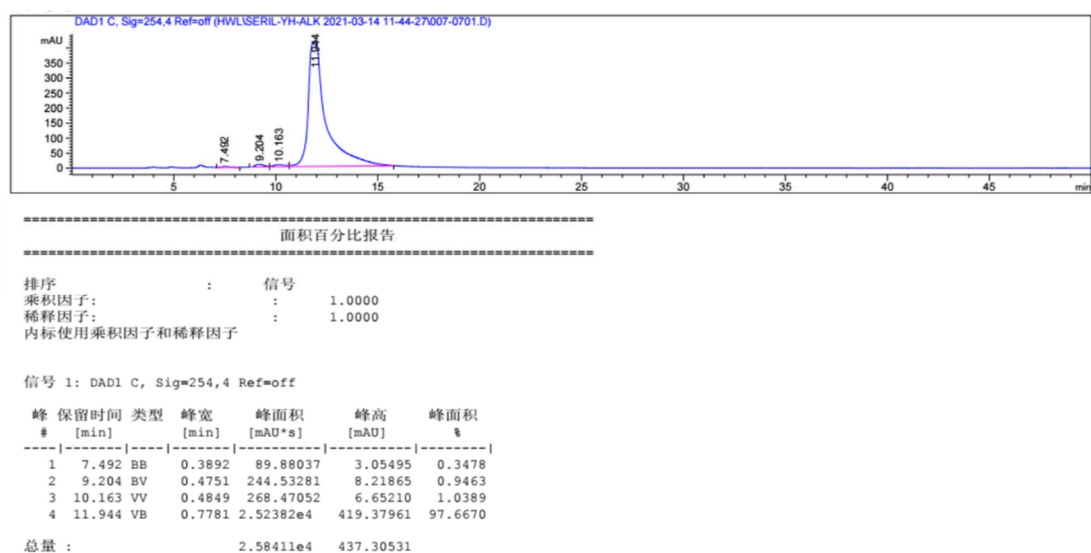

Figure S47. HPLC of 9j
